# Supplementary material for: Influence of Different Pt Functionalization Modes on the Properties of CuO Gas-Sensing Materials
Source: MDPI journal article supplement (doi:10.3390/s24010120), 2023-12-25
Supplement: s1 [file s1]

## **Influence of different Pt functionalization modes on the properties of CuO gas sensing materials**

Xiangxiang Chen <sup>a,b,c</sup>, Tianhao Liu <sup>a</sup>, Yunfei Ouyang <sup>a</sup>, Shiyi Huang <sup>a</sup>, Zhaoyang Zhang <sup>a</sup>, Fangzheng Liu <sup>a</sup>, Lu Qiu <sup>a</sup>, Chicheng Wang <sup>a</sup>, Xincheng Lin <sup>a</sup>, Junyan Chen <sup>a</sup>,  
Yanbai Shen <sup>c\*</sup>

<sup>a</sup> Zijin School of Geology and Mining, Fuzhou University, Fuzhou 350108, China

<sup>b</sup> Fujian Key Laboratory of Green Extraction and High Value Utilization of New Energy Metals, Fuzhou 350108, China

<sup>c</sup> School of Resources and Civil Engineering, Northeastern University, Shenyang 110819, China

---

\*Corresponding author.

E-mail address: shenyanbai@mail.neu.edu.cn (Y. Shen).

### **Table of Contents**

**Figure S1.** Response and recovery curves of the sensors based on pristine and Pt-loaded CuO nanorods upon exposure to 5 ppm NO<sub>2</sub> at various operating temperature. (a) Pristine; (b) 1 mol% Pt@CuO; (c) 2 mol% Pt@CuO; (d) 5 mol% Pt@CuO.....S-2

**Figure S2.** Response and recovery curves of the sensors based on pristine and Pt-doped CuO nanorods upon exposure to 5 ppm NO<sub>2</sub> at various operating temperature. (a) Pristine; (b) 1 mol% Pt-CuO; (c) 2 mol% Pt-CuO; (d) 5 mol% Pt-CuO.....S-3

**Figure S3.** FTIR spectra of (A) Pt-loaded and (B) Pt-doped CuO nanorods with different Pt concentration. (a) 0 mol% Pt; (b) 1 mol% Pt; (c) 2 mol% Pt; (d) 5 mol% Pt.....S-4

**Figure S4.** Response and recovery curves of the sensors based on 2 mol% (A) Pt-loaded CuO and (B) Pt-doped CuO nanorods upon exposure to 2 ppm NO<sub>2</sub> at 25 °C and different humidity.....S-5

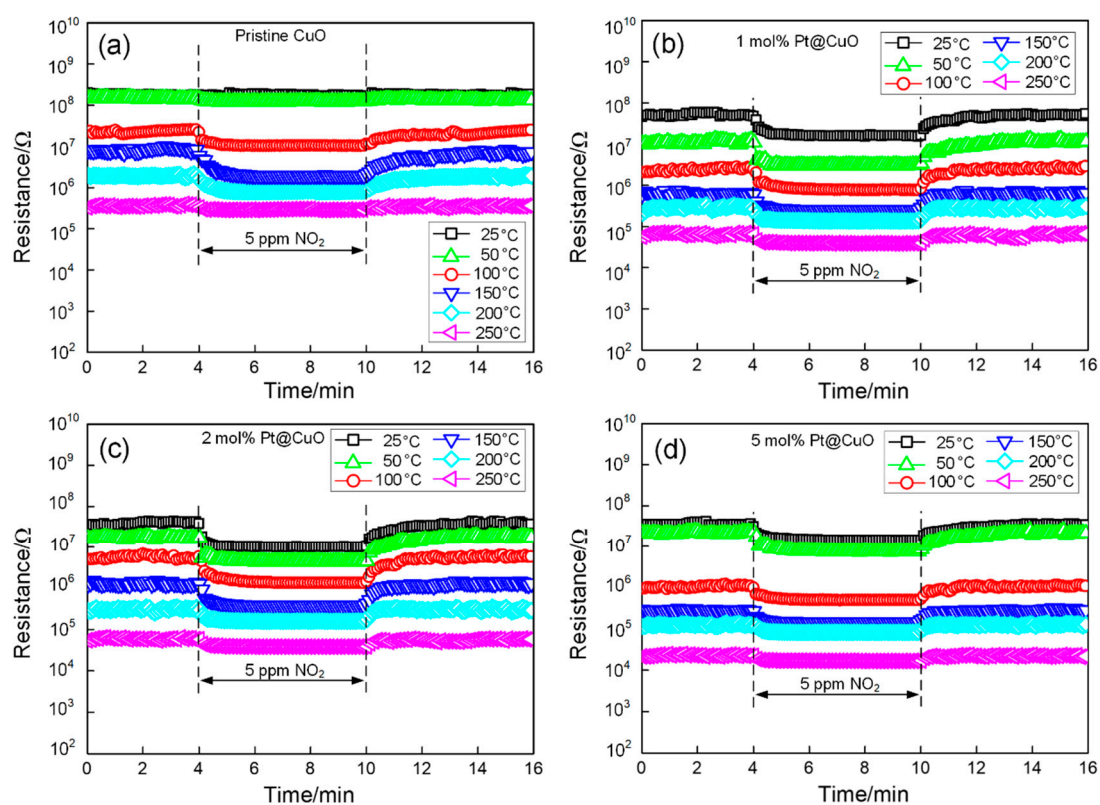

**Figure S1.** Response and recovery curves of the sensors based on pristine and Pt-loaded CuO nanorods upon exposure to 5 ppm NO<sub>2</sub> at various operating temperature  
(a) Pristine; (b) 1 mol% Pt@CuO; (c) 2 mol% Pt@CuO; (d) 5 mol% Pt@CuO

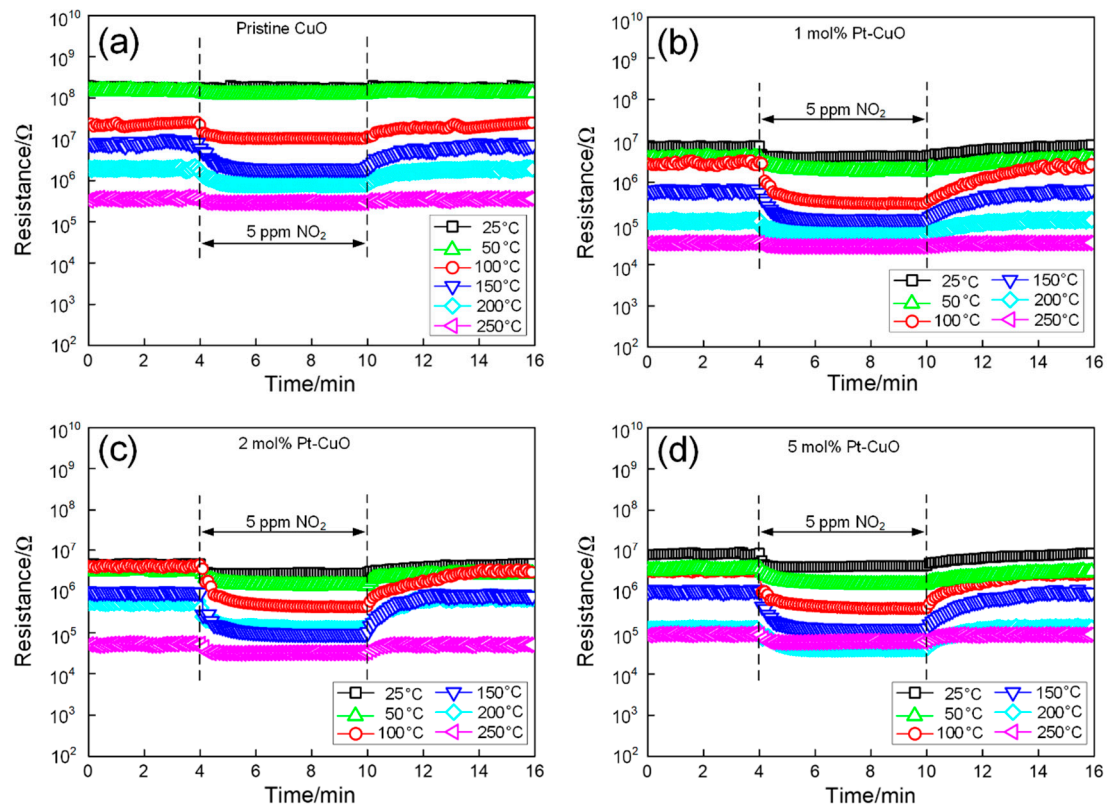

**Figure S2.** Response and recovery curves of the sensors based on pristine and Pt-doped CuO nanorods upon exposure to 5 ppm  $\text{NO}_2$  at various operating temperature  
(a) Pristine; (b) 1 mol% Pt-CuO; (c) 2 mol% Pt-CuO; (d) 5 mol% Pt-CuO

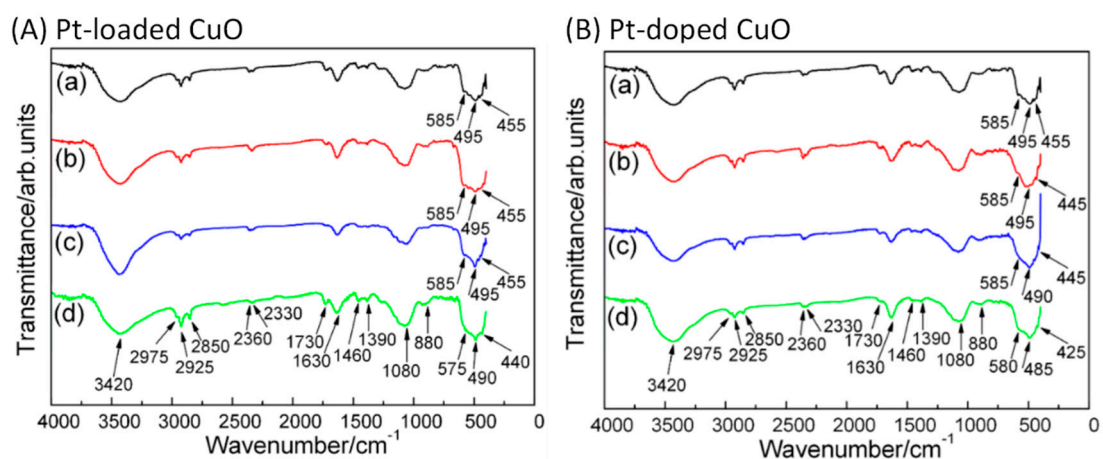

**Figure S3.** FTIR spectra of (A) Pt-loaded and (B) Pt-doped CuO nanorods with different Pt concentration

(a) 0 mol% Pt; (b) 1 mol% Pt; (c) 2 mol% Pt; (d) 5 mol% Pt

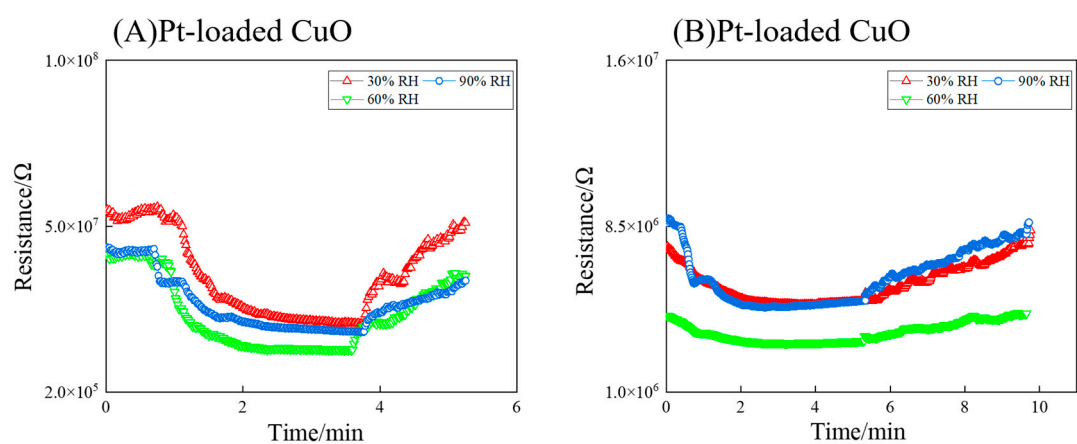

**Figure S4.** Response and recovery curves of the sensors based on 2 mol% (A) Pt-loaded CuO and (B) Pt-doped CuO nanorods upon exposure to 2 ppm  $\text{NO}_2$  at 25  $^\circ\text{C}$  and different humidity
